# Supplementary material
Source: publisher figshare collection journal article supplement (https://acs.figshare.com/ndownloader/files/22176864)
Supplement: Supplementary file 1 [file 22176864]

Supplement Information

# The Effect of Insulating Oxide Overlayers on Electron Injection Dynamics in Dye-Sensitized Nanocrystalline Thin Films

Jianchang Guo, Chunxing She, Tianquan Lian\*

Department of Chemistry, Emory University, Atlanta, GA 30322, USA

\* Corresponding author, [tliau@emory.edu](mailto:tliau@emory.edu)

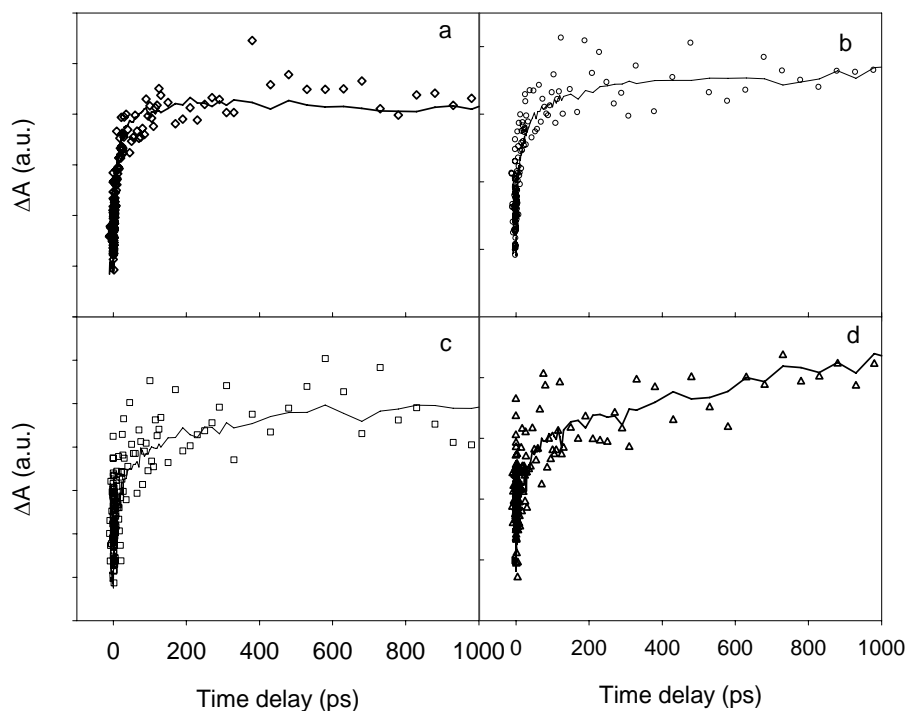

**Figure S1.** Comparison of the growth kinetics of injected electron absorption (solid line, averaged value from 2120 to 2150 cm<sup>-1</sup>) and oxidized peak (symbols, integrated

peak area from 2076 to 2110  $\text{cm}^{-1}$ ) for ReC1P on  $\text{TiO}_2$  with (a) 0, (b) 1, (c) 2, and (d) 3 over-layers of  $\text{Al}_2\text{O}_3$ . The injected electron and oxidized dye signals agree well at all time delays, indicating that either one can be used to monitor the electron transfer dynamics.
